# Supplementary material for: Proton controlled synthesis of two dicopper(ii) complexes and their magnetic and biomimetic catalytic studies together with probing the binding mode of the substrate to the metal center
Source: Royal Society of Chemistry journal article supplement (doi:10.1039/d1dt02369a), 2021-01-01
Supplement: d1dt02369a1.pdf [file d1dt02369a1.pdf]

## Supplementary Information

### **Proton controlled synthesis of two dicopper(II) complexes and their magnetic and biomimetic catalytic studies along with probing the binding mode of the substrate to the metal centre**

Narayan Ch. Jana,<sup>a</sup> Pravat Ghorai,<sup>a,b</sup> Paula Brandão,<sup>c</sup> Zvonko Jagličić,<sup>d</sup> and Anangamohan Panja<sup>\*a,c</sup>

<sup>a</sup> Department of Chemistry, Panskura Banamali College, Panskura RS, WB 721152, India

<sup>b</sup> Department of Chemistry, Jadavpur University, Kolkata-700032, India

<sup>c</sup> Department of Chemistry, CICECO-Aveiro Institute of Materials, University of Aveiro, 3810-193 Aveiro, Portugal

<sup>d</sup> Institute of Mathematics, Physics and Mechanics & Faculty of Civil and Geodetic Engineering, University of Ljubljana, Jadranska 19, 1000 Ljubljana, Slovenia

<sup>e</sup> Department of Chemistry, Gokhale Memorial Girls' College, 1/1 Harish Mukherjee Road, Kolkata-700020, India.

\* Corresponding author e-mail: ampanja@yahoo.co.in

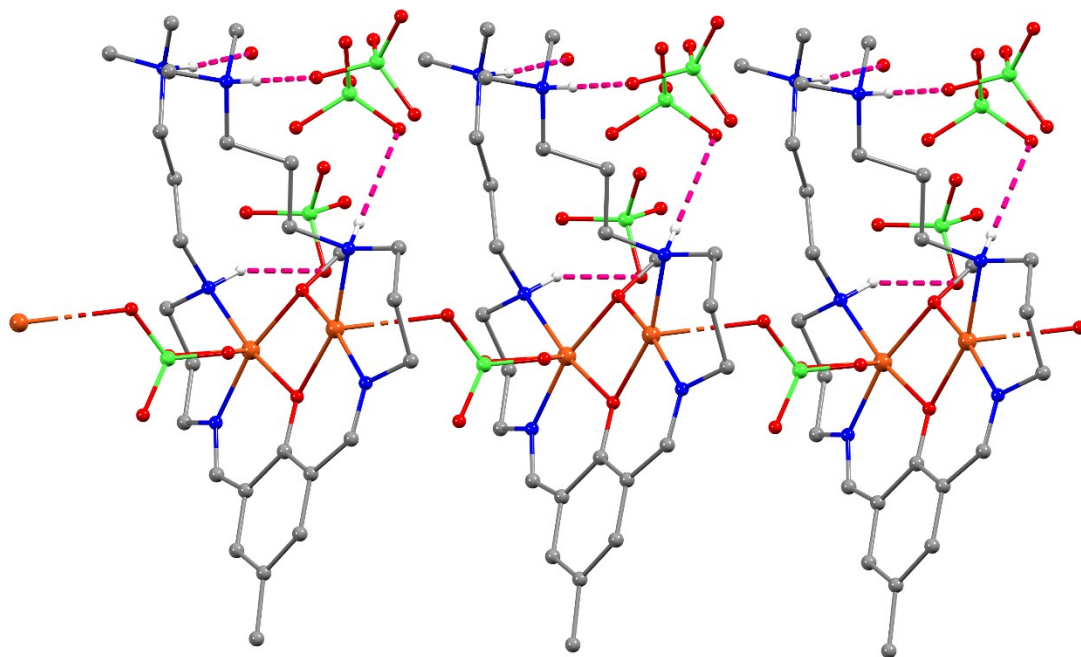

**Fig. S1.** Hydrogen bonding interaction in complex **1**

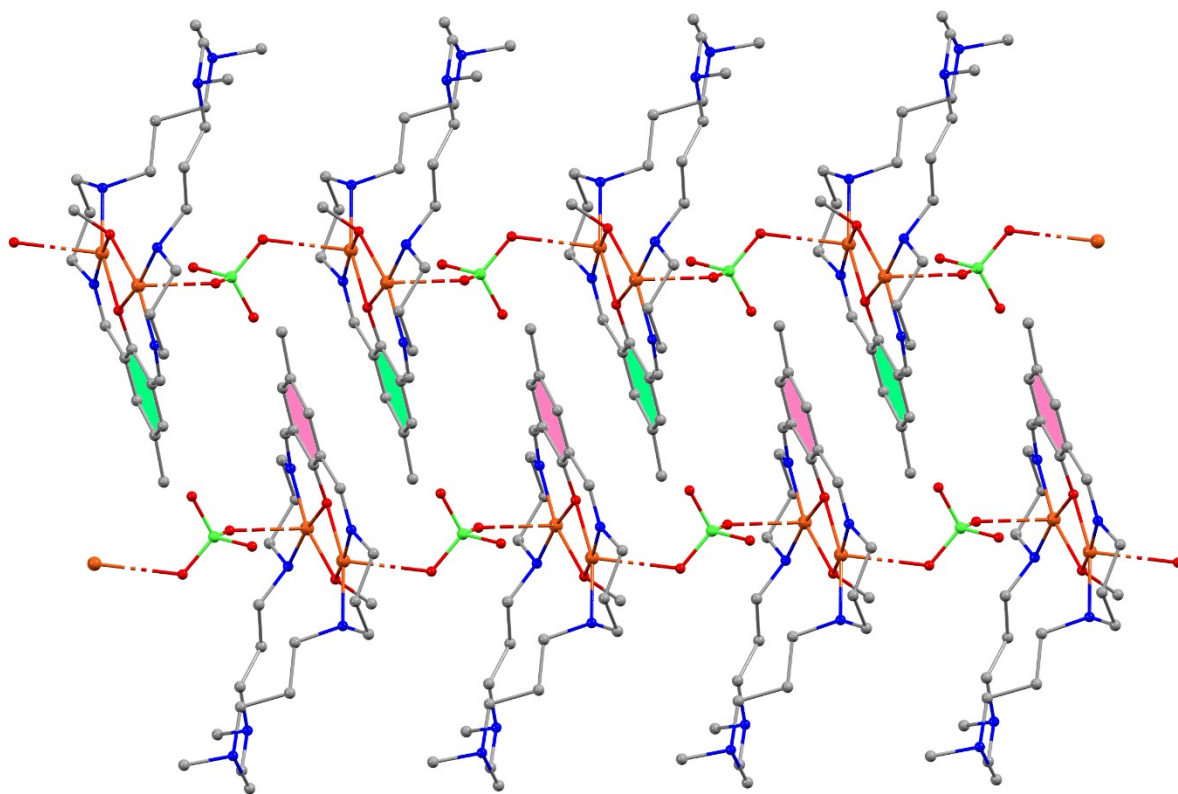

**Fig. S2.** The  $\pi$ - $\pi$  interlocking in the chain structure of complex **1**

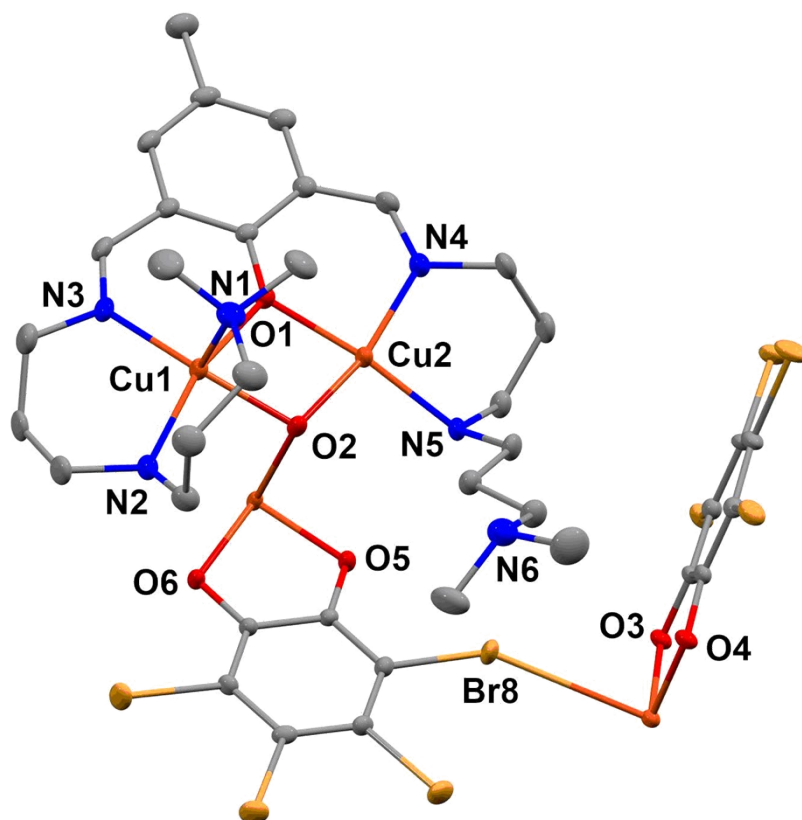

**Fig. S3.** Complex cation of **3** in the asymmetric unit. Hydrogen atoms are omitted for clarity of the picture.

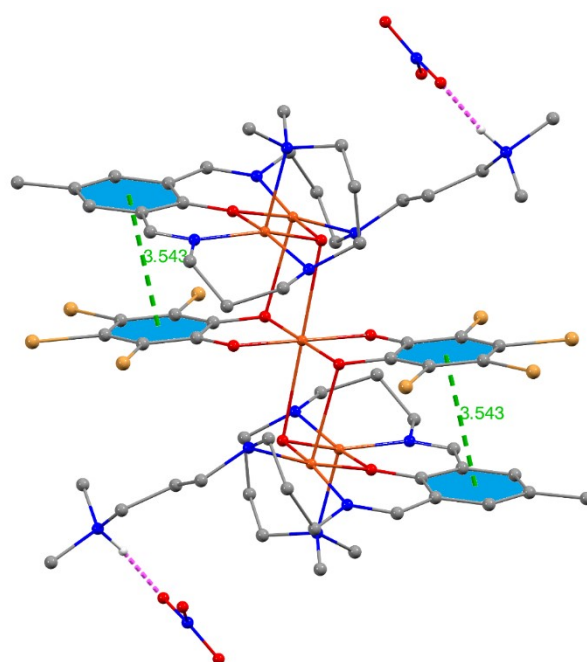

**Fig. S4.** The  $\pi$ - $\pi$  stacking and hydrogen bonding interactions in **3**.

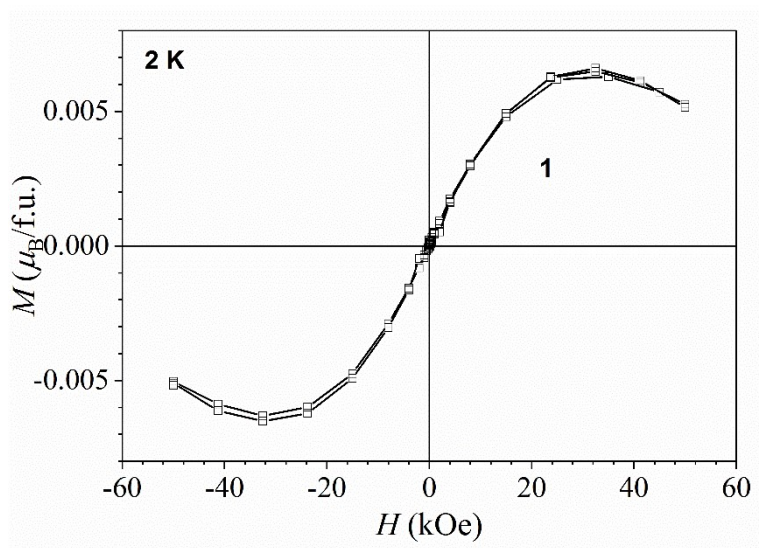

**Fig. S5.** Isothermal magnetization of **1** at 2 K in the applied dc field 0–50 KOe.

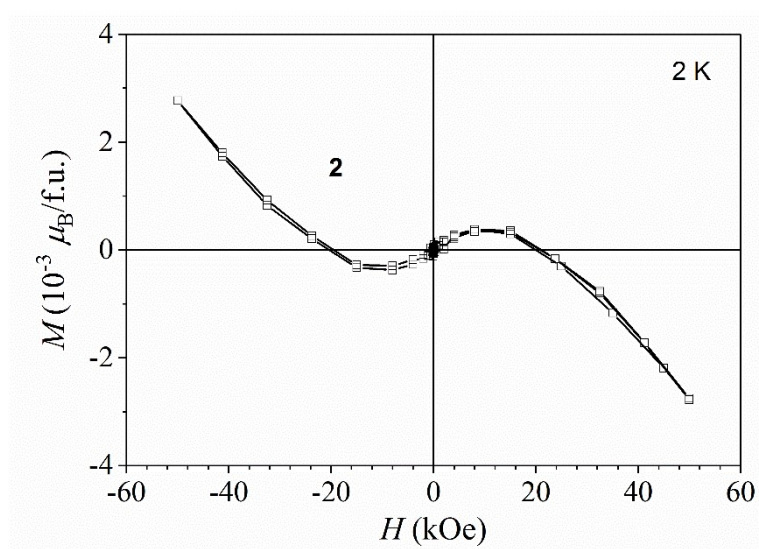

**Fig. S6.** Isothermal magnetization of **2** at 2 K in the applied dc field 0–50 KOe.

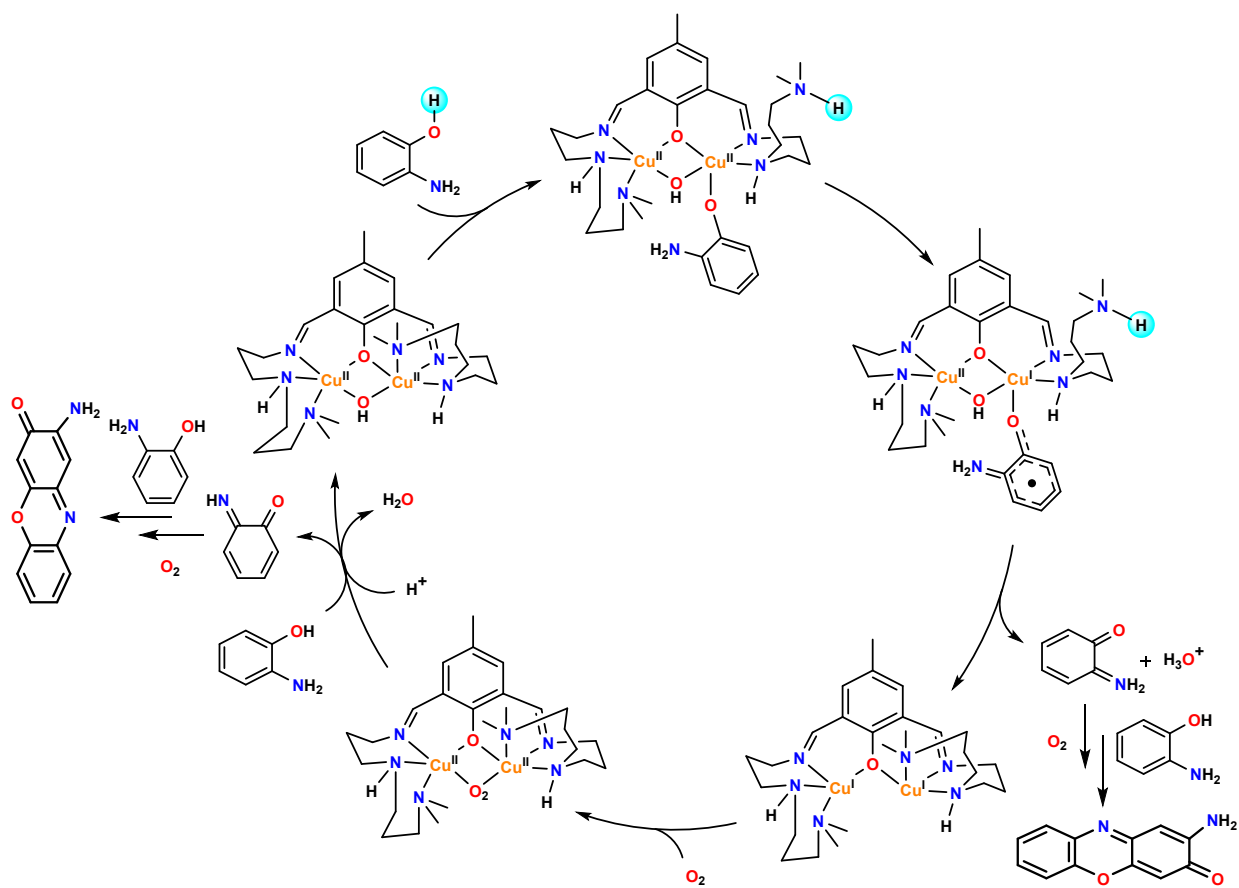

**Scheme S1.** The most probable catalytic cycle for the oxidation of OAPH by complex 2
